# Supplementary material for: Detection of SARS-CoV-2 in the ocular surface in different phases of COVID-19 patients in Shanghai, China
Source: PubMed Central journal article supplement — Ann Transl Med. 2021 Jan;9(2):100. doi: 10.21037/atm-20-6026 (PMC7867919; doi:10.21037/atm-20-6026), 2021-01
Supplement: atm-09-02-100-rc.pdf [file atm-09-02-100-rc.pdf]

## **Materials Design Analysis Reporting (MDAR) Checklist for Authors**

The MDAR framework establishes a minimum set of requirements in transparent reporting applicable to studies in the life sciences (see Statement of Task: [doi:10.31222/osf.io/9sm4x](https://doi.org/10.31222/osf.io/9sm4x)). The MDAR checklist is a tool for authors, editors and others seeking to adopt the MDAR framework for transparent reporting in manuscripts and other outputs. Please refer to the MDAR Elaboration Document for additional context for the MDAR framework.

**Materials**

| <b>Antibodies</b>                                                                                                                                                                                       | <b>Yes (indicate where provided:</b>        | <b>n/a</b> | <b>Reasons for NA</b>           |
|---------------------------------------------------------------------------------------------------------------------------------------------------------------------------------------------------------|---------------------------------------------|------------|---------------------------------|
| For commercial reagents, provide supplier name, catalogue number and RRID, if available.                                                                                                                |                                             | n/a        | No antibody was used            |
| <b>Cell materials</b>                                                                                                                                                                                   | <b>Yes (indicate where provided:</b>        | <b>n/a</b> |                                 |
| <b>Cell lines:</b> Provide species information, strain. Provide accession number in repository <b>OR</b> supplier name, catalog number, clone number, <b>OR</b> RRID                                    |                                             | n/a        | No cell line was used           |
| <b>Primary cultures:</b> Provide species, strain, sex of origin, genetic modification status.                                                                                                           |                                             | n/a        | No primary culture was used     |
| <b>Experimental animals</b>                                                                                                                                                                             | <b>Yes (indicate where provided:</b>        | <b>n/a</b> |                                 |
| <b>Laboratory animals:</b> Provide species, strain, sex, age, genetic modification status. Provide accession number in repository <b>OR</b> supplier name, catalog number, clone number, <b>OR</b> RRID |                                             | ✓          | No experimental animal was used |
| <b>Animal observed in or captured from the field:</b> Provide species, sex and age where possible                                                                                                       |                                             | ✓          | No experimental animal was used |
| <b>Model organisms:</b> Provide Accession number in repository (where relevant) <b>OR</b> RRID                                                                                                          |                                             | ✓          | No experimental animal was used |
| <b>Plants and microbes</b>                                                                                                                                                                              | <b>Yes (indicate where provided:</b>        | <b>n/a</b> |                                 |
| <b>Plants:</b> provide species and strain, unique accession number if available, and source (including location for collected wild specimens)                                                           |                                             | n/a        | No plant was used               |
| <b>Microbes:</b> provide species and strain, unique accession number if available, and source                                                                                                           |                                             | n/a        | No microbe was used             |
| <b>Human research participants</b>                                                                                                                                                                      | <b>Yes (indicate where provided:</b>        | <b>n/a</b> |                                 |
| Identify authority granting ethics approval (IRB or equivalent committee(s), provide reference number for approval.                                                                                     | Materials, Paragraph 3 (Page 5, Line 42-43) |            |                                 |
| Provide statement confirming informed consent obtained from study participants.                                                                                                                         | Materials, Paragraph 3 (Page 5, Line 40-41) |            |                                 |
| Report on age and sex for all study participants.                                                                                                                                                       | Result, Paragraph 1 (Page 7, Line 73-74)    |            |                                 |

**Design**

|                                                                                                                                                                     |                                             |            |                                 |
|---------------------------------------------------------------------------------------------------------------------------------------------------------------------|---------------------------------------------|------------|---------------------------------|
| <b>Study protocol</b>                                                                                                                                               | <b>Yes (indicate where provided:</b>        | <b>n/a</b> | <b>Reason for NA</b>            |
| For clinical trials, provide the trial registration number <b>OR</b> cite DOI in manuscript.                                                                        |                                             | <b>n/a</b> | Not a clinical trial.           |
| <b>Laboratory protocol</b>                                                                                                                                          | <b>Yes (indicate where provided:</b>        | <b>n/a</b> |                                 |
| Provide DOI or other citation details if detailed step-by-step protocols are available.                                                                             |                                             | <b>n/a</b> | No lab experiment was done      |
| <b>Experimental study design (statistics details)</b>                                                                                                               | <b>Yes (indicate where provided:</b>        | <b>n/a</b> |                                 |
| State whether and how the following have been done, <b>or</b> if they were not carried out.                                                                         |                                             |            |                                 |
| Sample size determination                                                                                                                                           | Not carried out                             |            |                                 |
| Randomisation                                                                                                                                                       |                                             | <b>n/a</b> | observation study               |
| Blinding                                                                                                                                                            |                                             | <b>n/a</b> | observation study               |
| Inclusion/exclusion criteria                                                                                                                                        | Materials, Paragraph 1 (Page 5, Line 27-30) |            |                                 |
| <b>Sample definition and in-laboratory replication</b>                                                                                                              | <b>Yes (indicate where provided:</b>        | <b>n/a</b> |                                 |
| State number of times the experiment was replicated in laboratory                                                                                                   |                                             | <b>n/a</b> | No lab experiment was done      |
| Define whether data describe technical or biological replicates                                                                                                     |                                             | <b>n/a</b> | No lab experiment was done      |
| <b>Ethics</b>                                                                                                                                                       | <b>Yes (indicate where provided:</b>        | <b>n/a</b> |                                 |
| Studies involving human participants: State details of authority granting ethics approval (IRB or equivalent committee(s), provide reference number for approval.   | Materials, Paragraph 3 (Page 5, Line 42-43) |            |                                 |
| Studies involving experimental animals: State details of authority granting ethics approval (IRB or equivalent committee(s), provide reference number for approval. |                                             | <b>n/a</b> | No experimental animal was used |
| Studies involving specimen and field samples: State if relevant permits obtained, provide details of authority approving study; if none were required, explain why. | Materials, Paragraph 3 (Page 5, Line 40-41) |            |                                 |
| <b>Dual Use Research of Concern (DURC)</b>                                                                                                                          | <b>Yes (indicate where provided:</b>        | <b>n/a</b> |                                 |
| If study is subject to dual use research of concern, state the authority granting approval and reference number for the regulatory approval                         |                                             | <b>n/a</b> | No dual use research            |

**Analysis**

|                                                                                                                                               |                                           |            |                                |
|-----------------------------------------------------------------------------------------------------------------------------------------------|-------------------------------------------|------------|--------------------------------|
| <b>Attrition</b>                                                                                                                              | <b>Yes (indicate where provided:</b>      | <b>n/a</b> | <b>Reasons for NA</b>          |
| State if sample or data point from the analysis is excluded, and whether the criteria for exclusion were determined and specified in advance. | No sample is excluded.                    |            |                                |
| <b>Statistics</b>                                                                                                                             | <b>Yes (indicate where provided:</b>      | <b>n/a</b> |                                |
| Describe statistical tests used and justify choice of tests.                                                                                  | Methods, Paragraph 7 (Page 7, Line 68-71) |            |                                |
| <b>Data Availability</b>                                                                                                                      | <b>Yes (indicate where provided:</b>      | <b>n/a</b> |                                |
| State whether newly created datasets are available, including protocols for access or restriction on access.                                  | Not available to protect patient privacy  |            |                                |
| If data are publicly available, provide accession number in repository or DOI or URL.                                                         |                                           | <b>n/a</b> | Data is not publicly available |
| If publicly available data are reused, provide accession number in repository or DOI or URL, where possible.                                  |                                           | <b>n/a</b> | Data is not publicly available |
| <b>Code Availability</b>                                                                                                                      | <b>Yes (indicate where provided:</b>      | <b>n/a</b> |                                |
| For all newly generated code and software essential for replicating the main findings of the study:                                           |                                           |            |                                |
| State whether the code or software is available.                                                                                              |                                           | <b>n/a</b> | No code/software is used       |
| If code is publicly available, provide accession number in repository, or DOI or URL.                                                         |                                           | <b>n/a</b> | No code/software is used       |

**Reporting**

|                                                                                                                                                                                                                                          |                                                                                               |            |
|------------------------------------------------------------------------------------------------------------------------------------------------------------------------------------------------------------------------------------------|-----------------------------------------------------------------------------------------------|------------|
| <b>Adherence to community standards</b>                                                                                                                                                                                                  | <b>Yes (indicate where provided: section/paragraph)</b>                                       | <b>n/a</b> |
| MDAR framework recommends adoption of discipline-specific guidelines, established and endorsed through community initiatives. Journals have their own policy about requiring specific guidelines and recommendations to complement MDAR. |                                                                                               |            |
| State if relevant guidelines (eg., ICMJE, MIBBI, ARRIVE) have been followed, and whether a checklist (eg., CONSORT, PRISMA, ARRIVE) is provided with the manuscript.                                                                     | ICMJE guidelines were followed, as the journal follows ICMJE recommendations for publication. |            |

Article information: <http://dx.doi.org/10.21037/atm-20-6026>
